# Supplementary material for: Ti3C2Tx (MXene)-wrapped V2O5/Fe2O3 composites for enhanced-performance supercapacitors
Source: Royal Society of Chemistry journal article supplement (doi:10.1039/d2nj00055e), 2022-01-01
Supplement: d2nj00055e1.pdf [file d2nj00055e1.pdf]

## SUPPORTING INFORMATION

### Ti<sub>3</sub>C<sub>2</sub>T<sub>x</sub> (MXene) - wrapped V<sub>2</sub>O<sub>5</sub>/Fe<sub>2</sub>O<sub>3</sub> composite for enhanced-performance supercapacitors

Yaqi Wang, Zhihu Pan, Xiaohong Ji\*

School of Materials Science and Engineering, South China University of Technology,

Guangzhou 510641, China

\*jxhong@scut.edu.cn

#### XPS survey spectrum of VFO/CC and core-level spectra of O 1s and C 1s

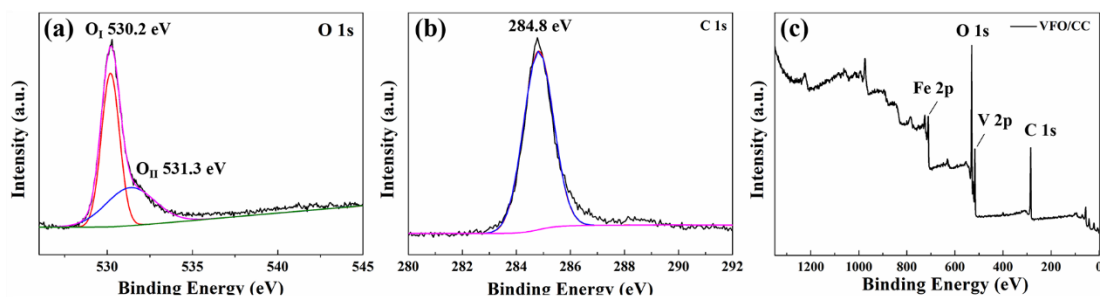

Fig. S1 (a) High-resolution XPS spectrum of O 1s. (b) High-resolution XPS spectrum of C 1s. (c)

XPS survey spectrum of the VFO/CC.

## Electrochemical performance of VFO/CC-T electrodes

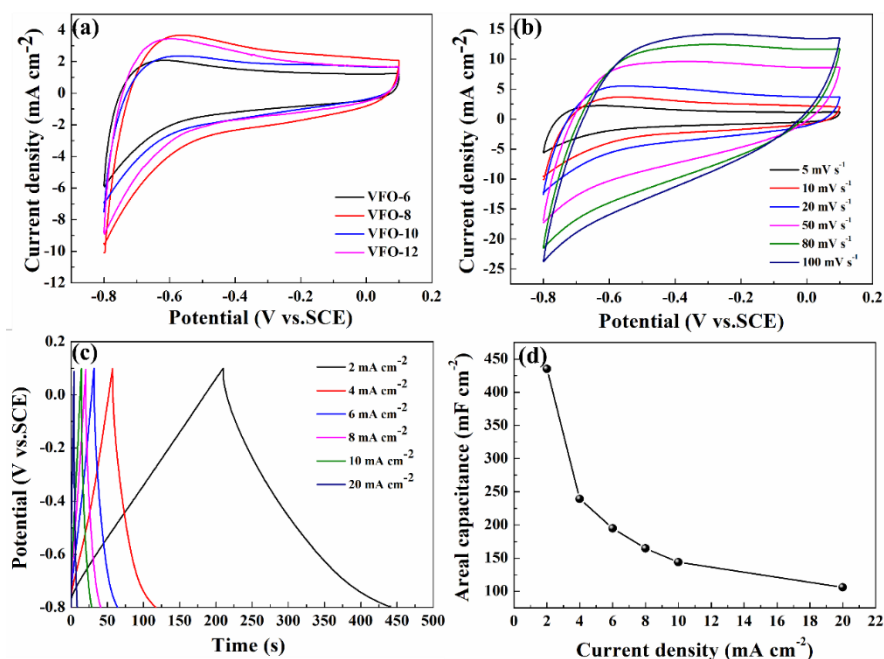

Fig. S2 (a) CV curves of VFO/CC-T at the scan rate of 10 mV s<sup>-1</sup>. (b) CV curves of VFO/CC-8 at different scan rates. (c) GCD curves of VFO/CC-8 at different current densities. (d) The areal capacitance of VFO/CC-8 at different current densities.

The electrochemical performance of VFO@CC-T electrode was evaluated in the three-electrode configuration, 1M Na<sub>2</sub>SO<sub>4</sub> was used as electrolyte solution, platinum plate as counter electrode and SCE as reference electrode, where T represents the hydrothermal time for the preparation of iron oxide nanorods. Fig. S2a shows the CV curves of VFO/CC-T at a scan rate of 10 mV s<sup>-1</sup>. The VFO/CC-8 electrode has the largest integral area in the potential window of -0.8 ~ 0V, which indicates that the charge storage capacity of the sample is the highest when the hydrothermal time is 8h. Fig. S2b shows the CV curves of VFO/CC-8 at different sweep rates. There are weak redox peaks in the CV curves, which proves that the charge of the sample is stored by the pseudo capacitive energy storage mechanism. The sample VFO/CC-8 was tested by GCD at the current density of 2 mA cm<sup>-2</sup> to 20 mA cm<sup>-2</sup> (Fig. S2c). Fig. S2d shows the

variation trend of area capacitance of VFO/CC-8 calculated from GCD curve. The area capacitance is  $435.2 \text{ mF cm}^{-2}$  at  $2 \text{ mA cm}^{-2}$ . With the increase of current density, the capacitance of VFO/CC-8 decreases gradually. At  $20 \text{ mA cm}^{-2}$ , the area capacitance is  $106 \text{ mF cm}^{-2}$  (capacitance retention is 24.4%).

XPS survey spectrum of 2.0-Ti<sub>3</sub>C<sub>2</sub>T<sub>x</sub>@VFO/CC

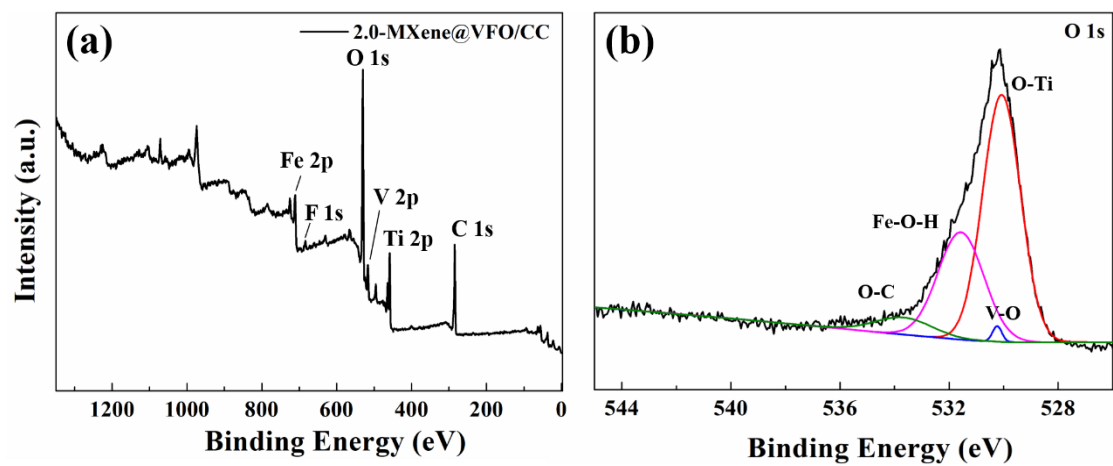

Fig. S3 (a) XPS survey spectrum of the 2.0-Ti<sub>3</sub>C<sub>2</sub>T<sub>x</sub>@VFO/CC. (b) High-resolution XPS spectrum of O 1s.

### Electrochemical performance of 3.0-Ti<sub>3</sub>C<sub>2</sub>T<sub>x</sub>@VFO/CC-8 electrodes

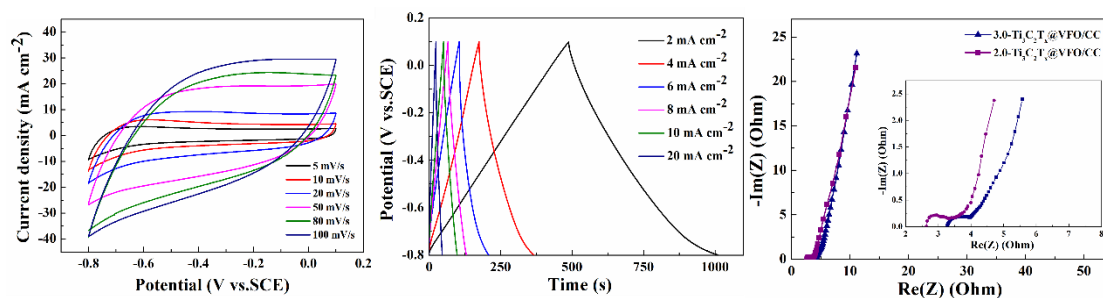

Fig. S4 (a) CV curves of 3.0-Ti<sub>3</sub>C<sub>2</sub>T<sub>x</sub>@VFO/CC-8 at different scan rates. (b) GCD curves of 3.0-Ti<sub>3</sub>C<sub>2</sub>T<sub>x</sub>@VFO/CC-8 at different current density. (c) Nyquist plots of 2.0-Ti<sub>3</sub>C<sub>2</sub>T<sub>x</sub>@VFO/CC and 3.0-Ti<sub>3</sub>C<sub>2</sub>T<sub>x</sub>@VFO/CC and the enlarged inset at high frequency.

The Nyquist test shows that the Ohmic impedance of 3.0-Ti<sub>3</sub>C<sub>2</sub>T<sub>x</sub>@VFO/CC-8 is higher than 2.0-Ti<sub>3</sub>C<sub>2</sub>T<sub>x</sub>@VFO/CC-8's, indicating that thicker Ti<sub>3</sub>C<sub>2</sub>T<sub>x</sub> leads to larger impedance of the electrode.

## Preparation of MnO<sub>2</sub> nanowires and its properties

The MnO<sub>2</sub> nanowire structures were synthesized on CC by the hydrothermal method at optimized condition. First, 0.1453 g manganese sulfate monohydrate and 0.3792 g potassium permanganate were dissolved in 40mL of DI water with stirring for 15 min. Then, this solution was transferred to a 100 mL Teflon-lined stainless-steel autoclave, and 2 pieces of carbon cloth was immersed in the autoclave and sealed and maintained at 140°C for 24h. The as obtained CC was removed from the autoclave and carefully rinsed with deionized water several times. Then, it was dried at 60°C for 6 h in air. The average mass loading of  $\alpha$ -MnO<sub>2</sub> on the carbon cloth was about 7.6 mg cm<sup>-2</sup>.

The structure of MnO<sub>2</sub> was studied by XRD. As shown in Fig. S5a, the diffraction peaks located at 12.74 °, 18.06 °, 28.75 °, 37.62 °, 42.03 °, 49.92 ° and 59.73 °, corresponding to (110), (200), (310), (301), (411) and (260) reflection planes of MnO<sub>2</sub> (JCPDS# 44-0141), respectively<sup>1</sup>. Fig. S5b is the SEM image of MnO<sub>2</sub>/CC. The surface of carbon cloth is fully covered by MnO<sub>2</sub> nanowires uniformly. In Fig. S5c, the CV curves of MnO<sub>2</sub>/CC electrode at different scanning rates (5 ~ 100 mV s<sup>-1</sup>) maintain a quasi-rectangular shape, and they tend to be more rectangular at lower scanning rates and elliptic at higher scanning rates. The change of its shape can be attributed to the rapid redox reaction on the surface caused by the ion adsorption/desorption in the electrolyte solution and the conversion of Mn valence state<sup>2</sup>. As shown in Fig. S5d, the area capacitance of MnO<sub>2</sub>/CC electrode at different current densities was calculated according to GCD curve. The area capacitance of MnO<sub>2</sub>/CC was 765.47 mF cm<sup>-2</sup> at 10 mV/s. When the sweep speed reaches 100 mV/s, the area capacitance of MnO<sub>2</sub>/CC was 254 mF cm<sup>-2</sup>, and the capacitance retention was about 33.18%.

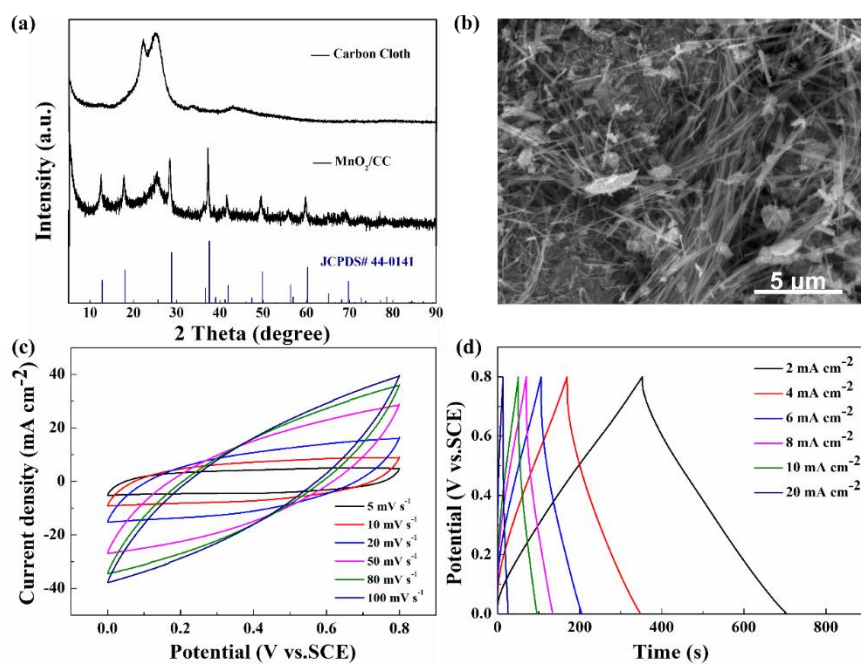

Fig. S5 (a) The XRD patterns of CC and MnO<sub>2</sub>/CC. (b) The SEM image of MnO<sub>2</sub>/CC. (c) CV curves of MnO<sub>2</sub>/CC at different scan rates. (d) GCD curves of MnO<sub>2</sub>/CC at different current density.

#### References:

- 1 Z.-H. Huang, Y. Song, D.-Y. Feng, Z. Sun, X. Sun and X.-X. Liu, High Mass Loading MnO<sub>2</sub> with Hierarchical Nanostructures for Supercapacitors, *ACS Nano*, 2018, **12**, 3557-3567.
- 2 P. Simon and Y. Gogotsi, Materials for electrochemical capacitors, *Nature Materials*, 2008, **7**, 845-854.
